# Supplementary material for: Analyses of Long-Term Epidemic Trends and Evolution Characteristics of Haplotype Subtypes Reveal the Dynamic Selection on SARS-CoV-2
Source: MDPI journal article supplement (doi:10.3390/v14030454), 2022-02-23
Supplement: s1 [file s1]

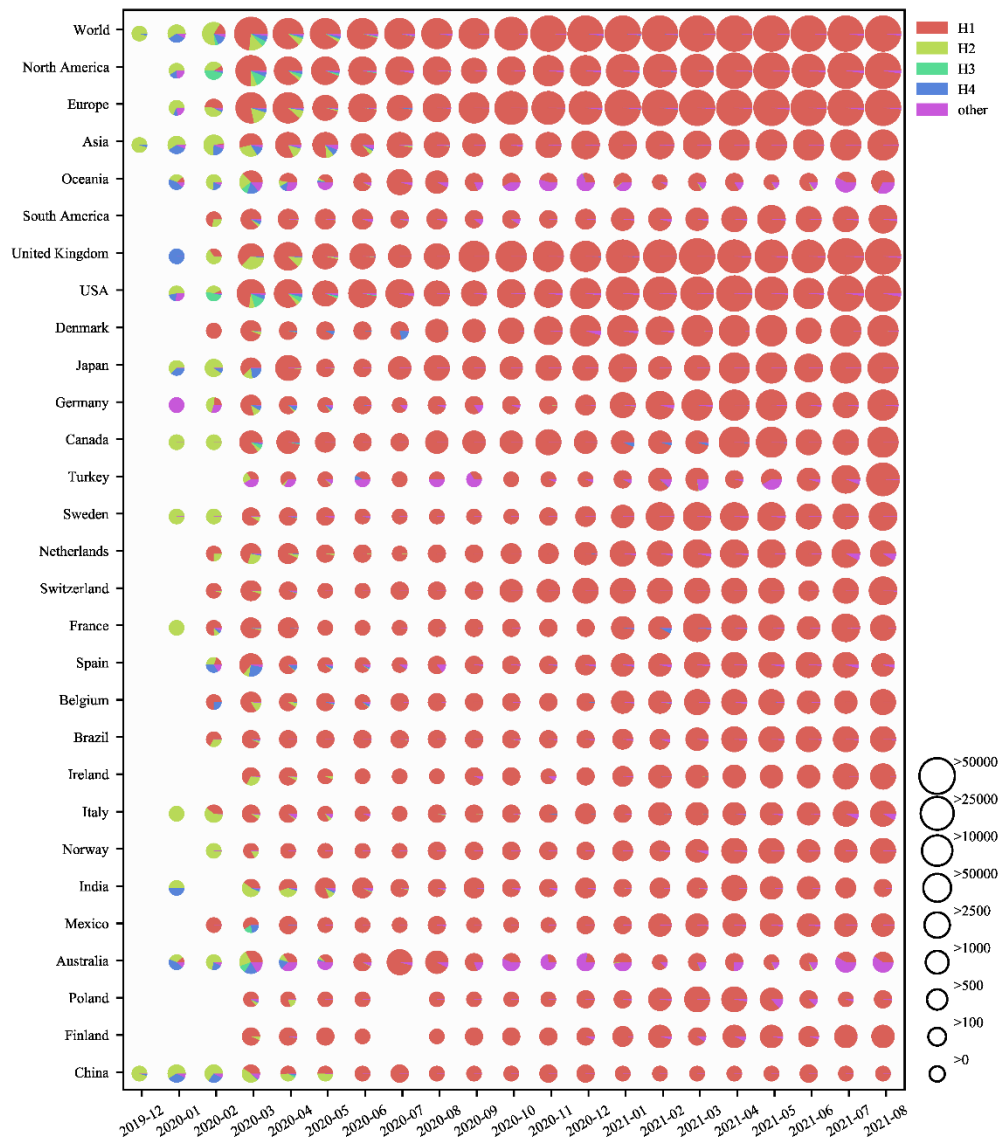

**Figure S1.** The epidemic trends of the 4 haplotype subtypes defined by the 9 specific mutation sites in different continents and countries (regions) with more than 10,000 genome sequences and China in different months.

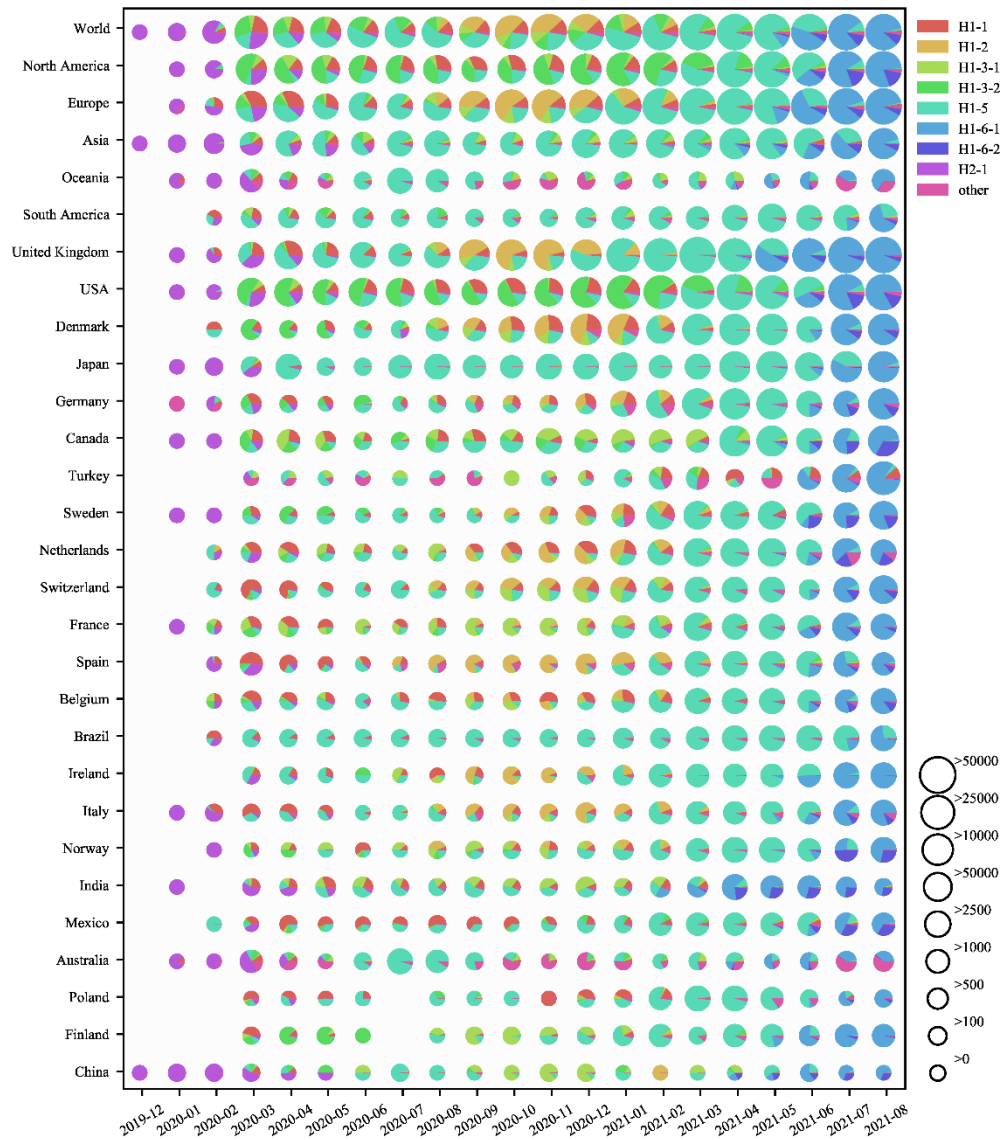

**Figure S2.** The epidemic trends of the 8 haplotype subtypes defined by the 16 specific mutation sites in different continents and countries (regions) with more than 10,000 genome sequences and China in different months.

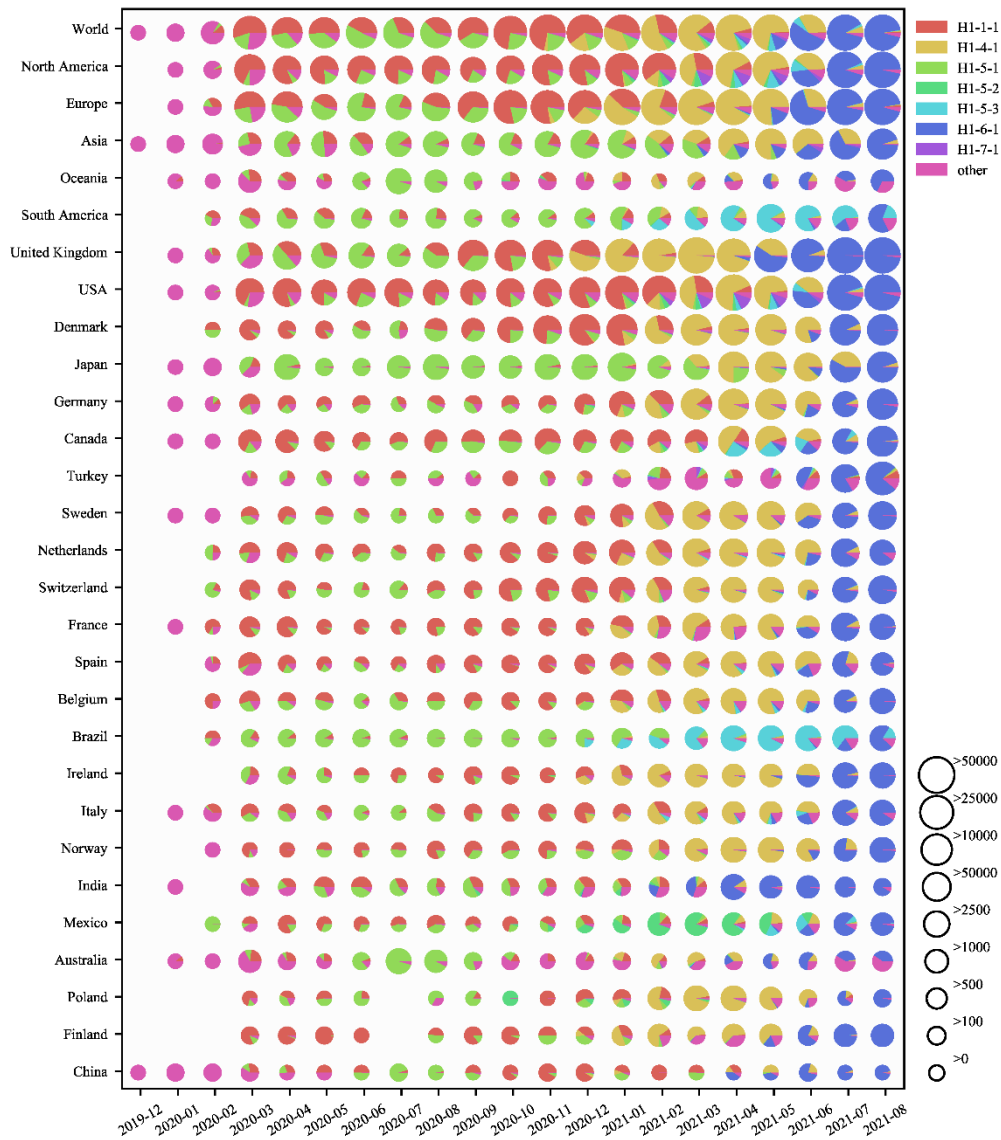

**Figure S3.** The epidemic trends of the 7 haplotype subtypes defined by the 30 specific mutation sites in different continents and countries (regions) with more than 10,000 genome sequences and China in different months.

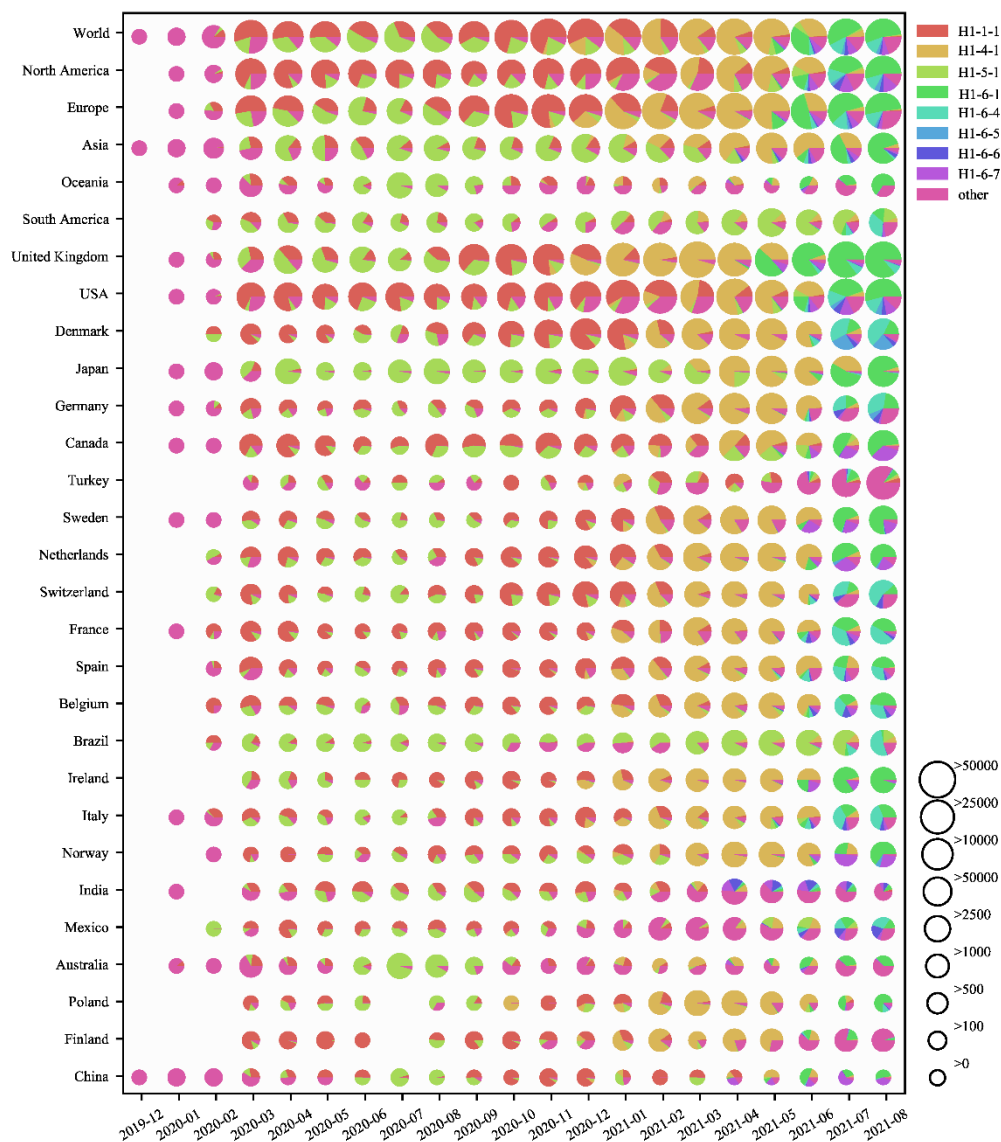

**Figure S4.** The epidemic trends of the 8 haplotype subtypes defined by the 33 specific mutation sites in different continents and countries (regions) with more than 10,000 genome sequences and China in different months.

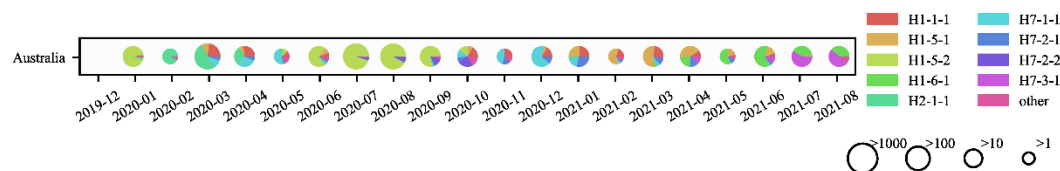

**Figure S5.** The epidemic trends of the 9 haplotype subtypes defined by the 13 specific mutation sites found in Australia in different months.
